# Supplementary material
Source: Elsevier journal article supplement (https://www.sciencedirect.com/science/article/pii/S021391111830150X)
Supplement: mmc1 [file S021391111830150X:mmc1.docx]

**Anexo 1**

**Proyectos en los que se diagnostica y transforma el entorno físico urbano, y que ofrecen oportunidades para introducir la perspectiva de la salud comunitaria mediante procesos participativos**

| **Proyecto** | **Ámbito de intervención principal relacionado con el entorno construido y urbanizado**  **# Ejes de los análisis y propuestas (sirven como puertas de entrada de agentes a los espacios de participación)** | **Participación de agentes de la comunidad y papel que desempeñan (generalización orientativa)** | | | | **Beneficios y oportunidades en relación con la salud comunitaria en cada fase** | | | **Nota** |
| --- | --- | --- | --- | --- | --- | --- | --- | --- | --- |
| **X XX (tractor, protagonista); X X (necesario);**  **X (importante), x (accesorio)** | | | **Accesibilidad del espacio de participación** | **1. Proceso: diagnóstico, proyecto y ejecución** | **2. Entorno intervenido y actividad vinculada** | **3. Gestión o vigilancia del entorno y la actividad** |
| **Administración local** | **Ciudadanía, asociaciones** | **Otras instituciones y sus agentes** |
| Camino escolar | Acondicionamiento y dinamización de itinerarios peatonales en el entorno urbano.  # Seguridad  # Autonomía infantil  # Actividad física  # Salud  # Movilidad sostenible | X X Alcaldía  X X Urbanismo  X Tráfico y seguridad  X Educación | X XX AMPA  X Alumnos  x Asociaciones de comerciantes | X X Centro escolar  X Centro de salud  X Salud pública | X X | X XX | X XX | X X | Existe mucha información accesible en la web (guías, experiencias). Ver *Camino escolar. Pasos hacia la autonomía infantil* (M. Román, I. Solís): [bit.do/CaminoEscolar](http://bit.do/CaminoEscolar) |
| Transformación de patios escolares | Transformación del patio escolar.  # Educación  # Género  # Cocreación  # Actividad física  # Salud  # Sostenibilidad medioambiental | X Alcaldía  X Urbanismo  X Educación | X XX AMPA  X Alumnas | X XX Centro escolar  X Consejería de Educación | X X | X XX | X XX | X | Existen numerosos foros en los que se están compartiendo experiencias y aprendizajes, como el Grupo Playgrounds - Asociación Ludantia: [bit.do/Ludantia](http://bit.do/Ludantia) |
| Activación de edificios en desuso y vacíos urbanos | Ocupación, apropiación, acondicionamiento, etc. de edificios en desuso y vacíos urbanos  Diseño de funciones, usos y programas vinculados al espacio  # Sostenibilidad social  # Empoderamiento  # Autogestión  # Uso temporal  # Comunidad | X X Alcaldía  X X Urbanismo | X XX Ciudadanía y asociaciones vecinales | X X Propietarios del solar o edificio | X XX | X XX | X XX | X XX | *Guía para la activación de Vacíos Urbanos Autogestionados (Todo por la Praxis):* [bit.do/activarVUA](http://bit.do/activarVUA) |
| Huertos urbanos, comunitarios, etc. | Ocupación, apropiación, acondicionamiento, etc. de terrenos en desuso y vacíos urbanos, para su uso como huertos urbanos de uso comunitario  # Sostenibilidad social  # Empoderamiento  # Autogestión  # Soberanía alimentaria  # Uso temporal  # Salud  # Comunidad | X Alcaldía  X X Urbanismo  X Medio ambiente | X XX Asociaciones ecologistas  X XX Ciudadanía y asociaciones vecinales  x Hortelanos del entorno | X X Propietarios del solar o terreno | X XX | X X | X X | X X | *Huertos urbanos* de Ecologistas en Acción: [bit.do/HuertosUrbanos](http://bit.do/HuertosUrbanos)  El huerto urbano como herramienta intercultural e intergeneracional:  [urbantactics.org](http://www.urbantactics.org/) |
| Circuitos y paseos saludables, *Rutas del colesterol,* etc. | Acondicionamiento y dinamización de itinerarios peatonales en el entorno urbano y periurbano  # Actividad física  # Salud  # Envejecimiento activo  # Bienestar | X Alcaldía  X X Deportes  X X Bienestar  X Urbanismo | X XX Asociaciones de personas mayores  X Ciudadanía y asociaciones vecinales  x Clubs deportivos | X X Centro de salud  X X Salud pública  X Consejería de deportes | X X | X XX | X XX | X | El acondicionamiento de estos circuitos y su dinamización son un ejemplo de intervención basada en los activos de la comunidad y en el conocimiento del vecindario: [bit.do/Ruta-Colesterol](http://bit.do/Ruta-Colesterol) |
| *Red Mundial de Ciudades y Comunidades Amigables con las Personas Mayores* | Diagnósticos y propuestas en torno al entorno construido, el transporte y la vivienda  # Seguridad  # Accesibilidad física  # Acción sensorial  # Acción cognitiva  # Envejecimiento activo  # Bienestar  # Edadismo  # Equidad | X X Alcaldía  X X Bienestar  X Urbanismo | X XX Asociaciones de personas mayores  x Ciudadanía | X X Consejería de bienestar  X Centro de salud | X X | X XX | X X | X | Desde instituciones supramunicipales se ofrecen recursos (asesoramiento, metodologías, visibilidad) para animar a los municipios y asociaciones interesadas: [ciudadesamigables.imserso.es](http://ciudadesamigables.imserso.es)  [euskadilagunkoia.net/es](http://euskadilagunkoia.net/es) |
| *Mapa de la Ciudad Prohibida, Ciudad de las Mujeres* | Diagnósticos y propuestas en torno al entorno construido (espacio público y equipamientos), el transporte y la vivienda  # Género  # Seguridad  # Accesibilidad  # Trabajo reproductivo  # Machismo  # Desigualdad  # Interseccionalidad  # Equidad | X Alcaldía  X X Igualdad  X X Urbanismo | X XX  Asociaciones feministas, grupos de mujeres  x Ciudadanía y asociaciones vecinales  x AMPA | X Consejería de igualdad  x  Centro escolar | X X | X XX | X X | - | Cada vez se realizan más procesos que superan la «supresión de puntos negros», sumando aspectos como el trabajo reproductivo, la movilidad, los espacios colectivos, etc. A la mirada de déficits se está incorporando la de activos. |
| Plan de accesibilidad | Supresión de barreras urbanas y arquitectónicas  # Accesibilidad física  # Acción sensorial  # Envejecimiento  # Bienestar  # Capacitismo  # Desigualdad  # Equidad | X Alcaldía  X XX Urbanismo  X Tráfico y seguridad  X Bienestar | X Ciudadanía y asociaciones vecinales  X Colectivos interesados | - | X | X X | X XX | - | Plan que incorpora «de serie» la mirada de la equidad. Se está produciendo un cambio de paradigma: de «la supresión de barreras» al «diseño de entornos capacitantes». Más oportunidades para trabajar en salud comunitaria si se coordinara con el plan de movilidad. |
| Plan de movilidad urbana sostenible | Ordenación del tráfico y la movilidad urbanos  # Seguridad  # Accesibilidad  # Género  # Conciliación | X X Alcaldía  X XX Urbanismo  X X Tráfico y seguridad  X Medio ambiente | X XAsoc. ecologista  x AMPA | X X Consejería de medio ambiente | X | X | X X | - | Más oportunidades para trabajar en salud comunitaria si se coordinaran con los planes de accesibilidad. |
| Plan estratégico del deporte | Diagnóstico, objetivos y plan de acciones relacionados con el deporte y la actividad física  # Actividad física  # Salud  # Bienestar | X XX Deportes  X Alcaldía  X Urbanismo | X Clubs deportivos | x Centro escolar | X | X | X X | - | Cada vez se redactan más planes que abren el foco, pasando de «los equipamientos deportivos» a «crear con la ciudadanía entornos y oportunidades para ser físicamente más activa». |
| Proyecto de urbanización, proyectos sobre espacios y equipamientos públicos | Proyecto de área urbana a escala del barrio o inferior  Proyecto de equipamiento público (edificio, espacio al aire libre)  # Seguridad  # Accesibilidad  # Género  # Cuidados # Convivencia | X X Alcaldía  X XX Urbanismo | X Ciudadanía y asociaciones vecinales | - | X | X | X X | - |  |
| Planes urbanísticos: plan general de ordenación urbana, plan parcial, planes especiales (regeneración, renovación…) | Planeamiento urbanístico a escala municipal o inferior  Regeneración urbana a escala del barrio o inferior | X X Alcaldía  X XX Urbanismo | x Ciudadanía y asociaciones vecinales | - | - | X | X X | - |  |
| Otros sellos urbanos:  - Ciudades Amigas de la Infancia: [ciudadesamigas.org](http://ciudadesamigas.org/)  - Asociación Internacional de Ciudades Educadoras: [edcities.org](http://www.edcities.org/)  - Red de Ciudades que Caminan: [ciudadesquecaminan.org](http://www.ciudadesquecaminan.org/)  - Red de Ciudades por la Bicicleta: [ciudadesporlabicicleta.org](http://www.ciudadesporlabicicleta.org)  - Red Española de Ciudades Saludables: [recs.es](http://recs.es/)  - Red de Ayuntamientos Solidarios con el Alzheimer”: [bit.do/CiudadesAlzheimer](http://bit.do/CiudadesAlzheimer) | | X XX | - | - | - | - | - | - | Con frecuencia los «sellos urbanos» de este tipo se constituyen en recursos para el *marketing* urbano.  Por eso mismo, las instituciones y los agentes con responsabilidad sobre los determinantes de la salud deberían considerarlas como una oportunidad para introducir la perspectiva de la salud comunitaria, entre otras. |

AMPA: asociaciones de madres y padres de alumnos.
