# Supplementary material
Source: Elsevier journal article supplement (https://www.sciencedirect.com/science/article/pii/S021391111830150X)
Supplement: mmc2 [file S021391111830150X:mmc2.docx]

**Anexo 2**

**Experiencias de intervenciones en tejido residencial de barrio, vacíos urbanos o edificios en desuso**

| **Directorios** | |
| --- | --- |
| **Arquitecturas Colectivas** [arquitecturascolectivas.net](https://arquitecturascolectivas.net/) | Red de personas y colectivos que promueven la construcción participativa del entorno urbano. Proporciona un marco instrumental para la colaboración en diferentes tipos de proyectos e iniciativas. |
| **[vic] vivero de iniciativas ciudadanas**  [bit.do/vic-iniciativas](http://bit.do/vic-iniciativas) | Transferencias de la innovación ciudadana al espacio público. |
| **Archive TAZ**  [archivetaz.org](http://archivetaz.org/) | Observatorio que recoge experiencias de espacios de autoorganización ciudadana como campo de experimentación de una nueva autogestión urbana. |
| **Más que una casa**  [masqueunacasa.org](http://masqueunacasa.org) | Procesos colectivos de vivienda. |
| **Ecozoom!**  [ecozoom.mapunto.net/map](http://ecozoom.mapunto.net/map/) | Mapa general de los movimientos sociales. |
| **Red de huertos comunitarios de Madrid**  [bit.do/redhuertos](http://bit.do/redhuertos) | Iniciativa impulsada por ciudadanos que se dedican a la agricultura comunitaria en la ciudad de Madrid. |
| **Inter-Accions**  [inter-accions.org](http://www.inter-accions.org/) | Espacio laboratorio para crear comunidades de aprendizaje heterogéneas y transversales, haciendo de bisagra entre los espacios educativos institucionales y los no institucionales. |
| **Urbanbat**  [urbanbat.org](https://urbanbat.org/) | Proyectos relacionados con la innovación social y la creatividad ciudadana con el propósito de favorecer una cultura de la participación que contribuya al cuidado y la mejora del entorno. |
| **Civics**  [civics.cc](https://civics.cc/es/#!/iniciativas) | Mapa de la innovación ciudadana que cotidianamente desarrollan los ciudadanos en Iberoamérica. Herramienta digital de automapeo en formato de agenda-geolocalizada. |
| **596 acres**  [596acres.org](http://596acres.org/) | Mapa *on-line* interactivo que proporciona información sobre solares vacíos en Nueva York, como oportunidades para crear espacios de organización comunitaria y compromiso cívico. |
| **Ejemplos de proyectos impulsados dentro de un marco institucional**  Los proyectos se elaboran tras el contraste entre potenciales usuarios y protagonistas. Los trámites de legalización y licencias ya están avanzados. Los proyectos suelen ser temporales. | |
| **PlaBUITS** (Barcelona, 2012)  [bit.do/PlaBUITS](http://ajuntament.barcelona.cat/ecologiaurbana/ca/pla-buits)  [bit.do/PlaBUITS-Mapa](http://bit.do/PlaBUITS-Mapa) | PlaBUITS: Buits Urbans amb Implicació Territorial i Social. Se ofrece el uso de solares cerrados y vacíos a entidades y asociaciones sin ánimo de lucro que promuevan usos y actividades provisionales. |
|
| **Esto No Es Un Solar** (Zaragoza, 2009)  [estonoesunsolar.wordpress.com](https://estonoesunsolar.wordpress.com/)  [gravalosdimonte.wordpress.com](https://gravalosdimonte.wordpress.com/) | Mediante la participación de las juntas de distrito y las asociaciones vecinales en el proceso, en 2009 se acondicionan cinco solares abandonados y se gestionan para la cesión y uso comunitario. |
|
| **Ejemplos de proyectos que se formalizan luego del diálogo entre beneficiarios y la institución**  Inicialmente los usuarios se reapropian del espacio; luego consolidan el proyecto en colaboración con las instituciones. | |
| **EspaiGermanetes** (Barcelona, 2011)  [bit.do/EspaiGermanetes1](http://bit.do/EspaiGermanetes1)  [bit.do/EspaiGermanetes2](http://bit.do/EspaiGermanetes2)  [bit.do/EspaiGermanetes3](http://bit.do/EspaiGermanetes3) | Espacio autogestionado colectivamente; forma parte de la primera convocatoria del PlaBUITS, luego gana la cesión del espacio y en la actualidad está activo en la transformación del barrio. |
|
| **Gap Filler** (Nueva Zelanda, 2010)  [gapfiller.org.nz](http://gapfiller.org.nz/) | Demuestra que la regeneración de la ciudad no se basa únicamente en la evolución a gran escala por los sectores privados o públicos, y que las grandes cosas pueden lograrse con el poder de la comunidad y el ingenio. |
|
| **El Campo de Cebada** (Madrid, 2010)  [elcampodecebada.org](http://elcampodecebada.org/)  [bit.do/cebada1](http://bit.do/cebada1) | Solar en el barrio de La Latina, en Madrid, que resultó de la demolición de la piscina cubierta municipal (la única del Distrito Centro de la ciudad) en 2009. Desde 2010 se gestiona de forma comunitaria entre personas vecinas, agentes culturales, colectivos de arquitectos, asociaciones de vecinos, etc. |
| **Ejemplos de proyectos autogestionados**  Muchos proyectos surgen para dar un uso alternativo a espacios donde las instituciones no han logrado tener en cuenta los verdaderos intereses locales. | |
| **Calafou** (Barcelona)  [calafou.org](https://calafou.org/es) | Espacio cooperativista, pacífico y sostenible para el desarrollo de alternativas productivas, tecnológicas y de viviendas. Es un espacio autoorganizado que incluye desde naves industriales para actividad industrial hasta espacios comunes y viviendas dignas. |
|
| **Huertos Urbanos Benimaclet** (Valencia, 2010)  [bit.do/Benimaclet](http://bit.do/Benimaclet) | Espacio recuperado con la iniciativa de la Asociación de Vecinos y Vecinas de Benimaclet, y la participación de hortelanos y hortelanas del entorno. |
|
